# Supplementary material for: Strategies to reach and motivate migrant communities at high risk for TB to participate in a latent tuberculosis infection screening program: a community-engaged, mixed methods study among Eritreans
Source: PubMed Central journal article supplement (PMC7068882; doi:10.1186/s12889-020-8390-9), 2020-03-12
Supplement: 12889_2020_8390_MOESM1_ESM.pdf [file 12889_2020_8390_MOESM1_ESM.pdf]

**Additional file 1. Flowchart of LTBI-screening and treatment process**

**Project team meeting**

to determine best strategies to reach and motivate local Eritrean communities to participate in the LTBI education, screening and treatment program.

|                                                             |                                                        |                                                    |                                                                                |                                                           |                                                                 |
|-------------------------------------------------------------|--------------------------------------------------------|----------------------------------------------------|--------------------------------------------------------------------------------|-----------------------------------------------------------|-----------------------------------------------------------------|
| <b>Strategy 1</b><br>"Personal invitation and social media" | <b>Strategy 2</b><br>"Face-to-face promotion"          | <b>Strategy 3</b><br>"Dutch language classes"      | <b>Strategy 4</b><br>"Group housing"                                           | <b>Strategy 5</b><br>"Sport club"                         | <b>Strategy 6</b><br>"Eritrean Church"                          |
| <b>Education session*</b><br>at local community center      | <b>Education session*</b><br>at local community center | <b>Education session*</b><br>at the school         | <b>Education session*</b><br>at the house                                      | <b>Education session*</b><br>at sport club after training | <b>Promotion of intervention</b><br>after church service        |
| <b>LTBI screening</b><br>on appointment at the PHS          | <b>LTBI screening</b><br>3 afternoons at the PHS       | <b>LTBI screening</b><br>on appointment at the PHS | <b>LTBI screening</b><br>week night at the PHS (PHS 2)<br>at the house (PHS 4) | <b>LTBI screening</b><br>during week night at the PHS     | <b>Education* + LTBI screening</b><br>on appointment at the PHS |

**LTBI-screening by Medical Technical Assistants\*\***

if necessary professional interpreters were used

**1. Informed consent**

**2. Registration of the client**

Check of personal information of client (name, ID number, birthdate, nationality, insurance number) on list against ID card and health insurance card

**3. Health assessment through evaluation of the health questionnaire (with use of an interpreter):**

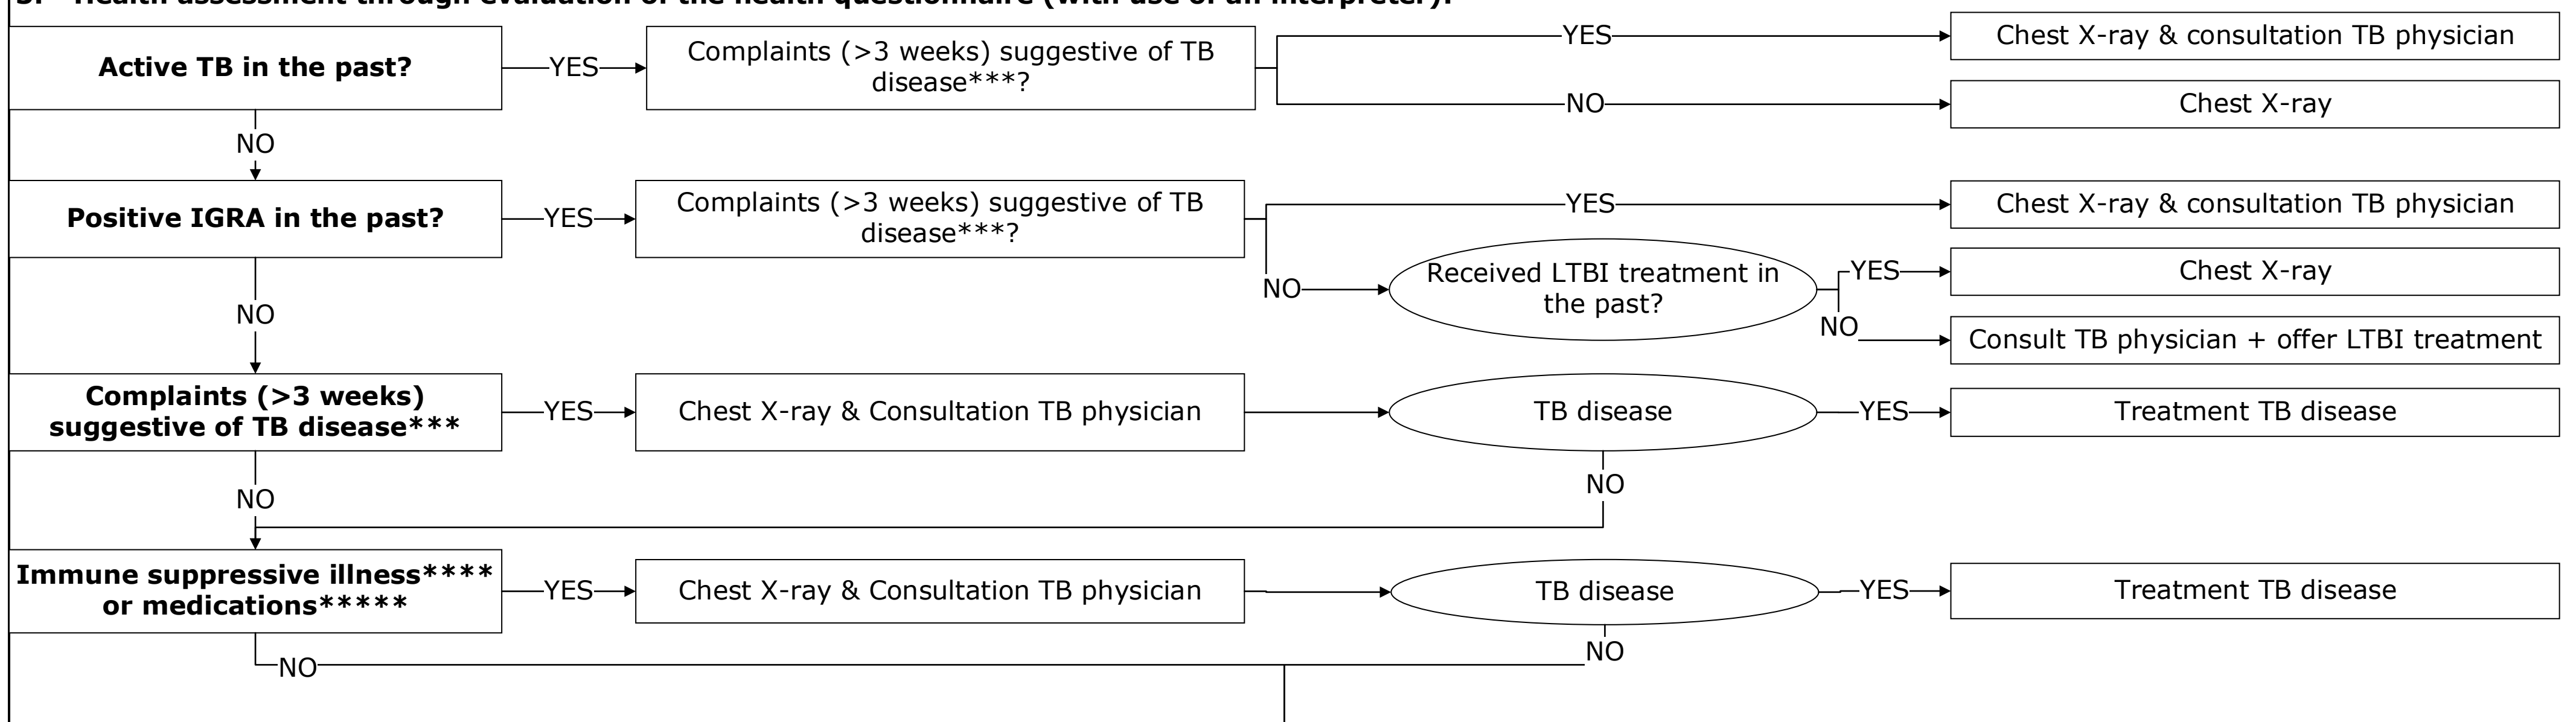

**IGRA**

LTBI testing was done with Interferon Gamma Release Assay (IGRA) using QuantiFERON-TB Gold Plus (QFT-Plus; Qiagen, Germantown MD) in accordance with the manufacturer's instructions

**5. Communication of LTBI test results**

Communication of IGRA test result through bilingual letter in (Dutch and Tigrinya)

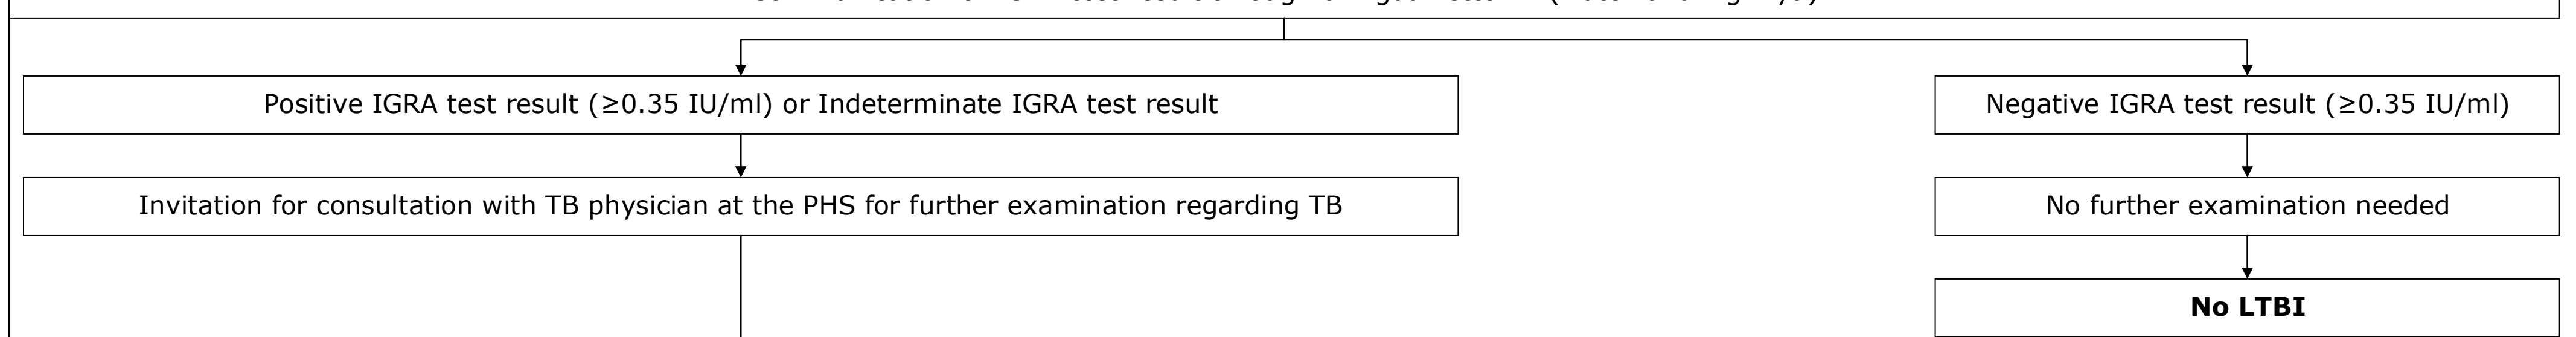

**Consultation TB physician**

if necessary professional interpreters were used

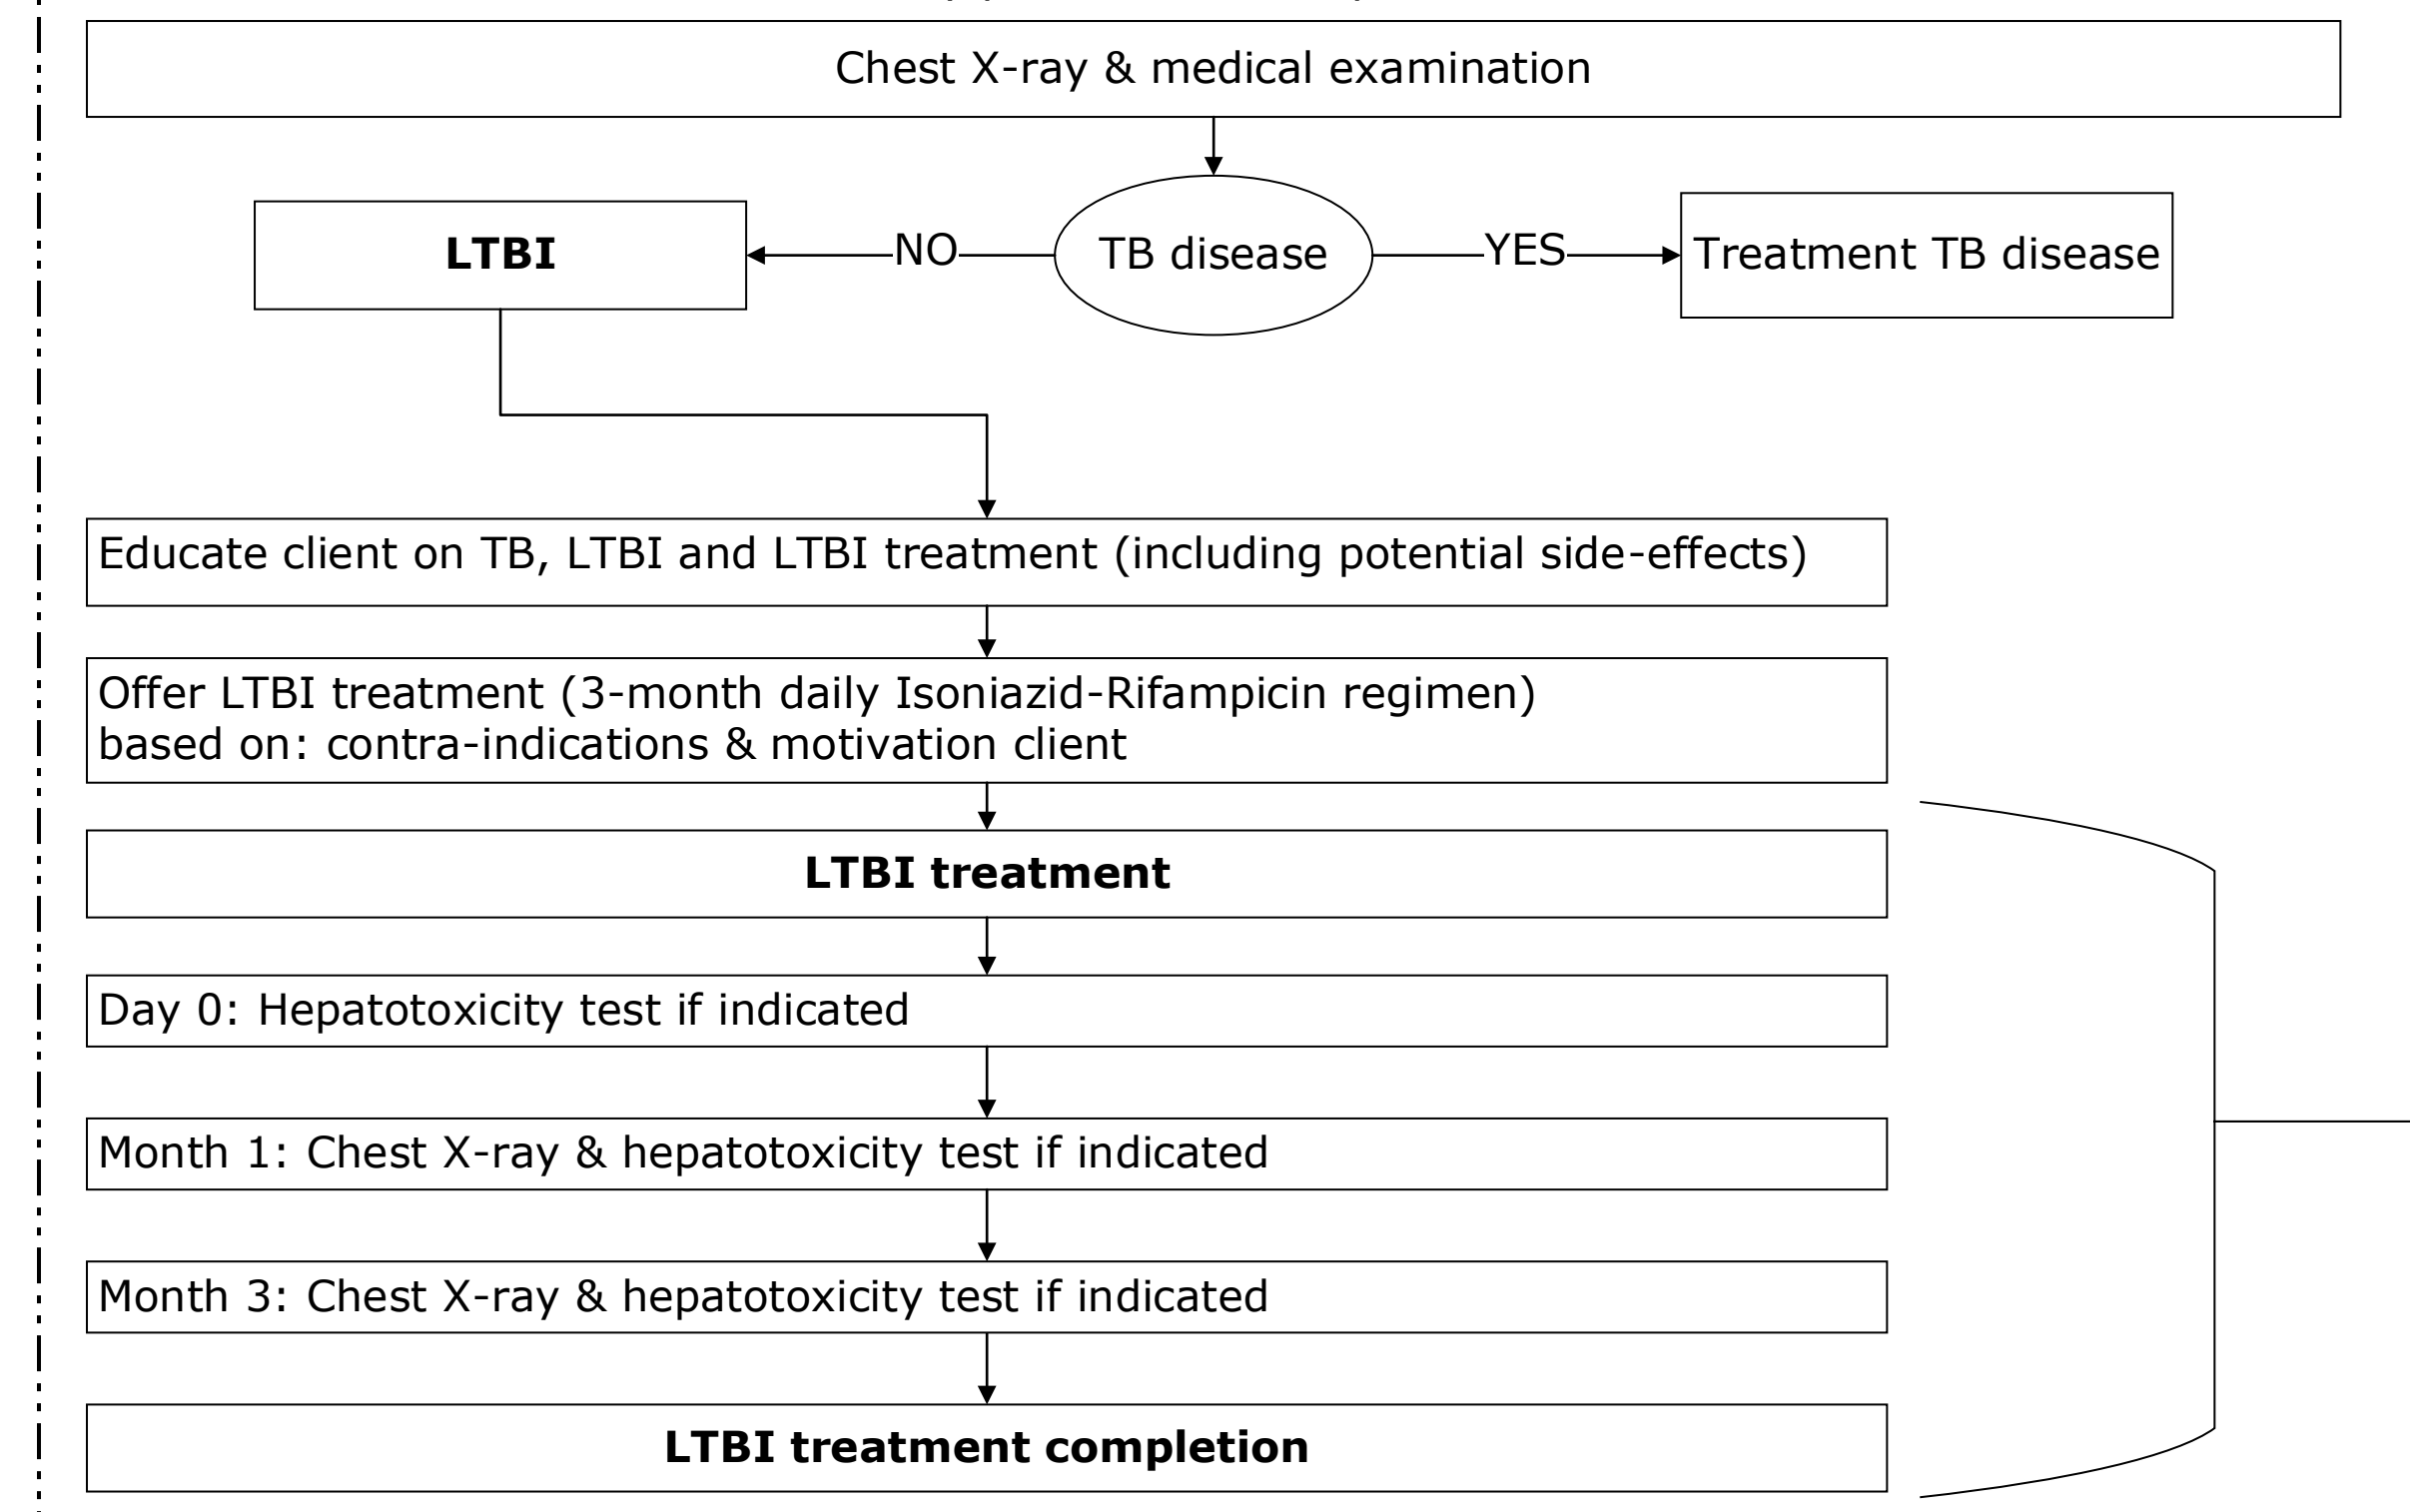

**LTBI treatment support by TB nurse**

if necessary professional interpreters were used

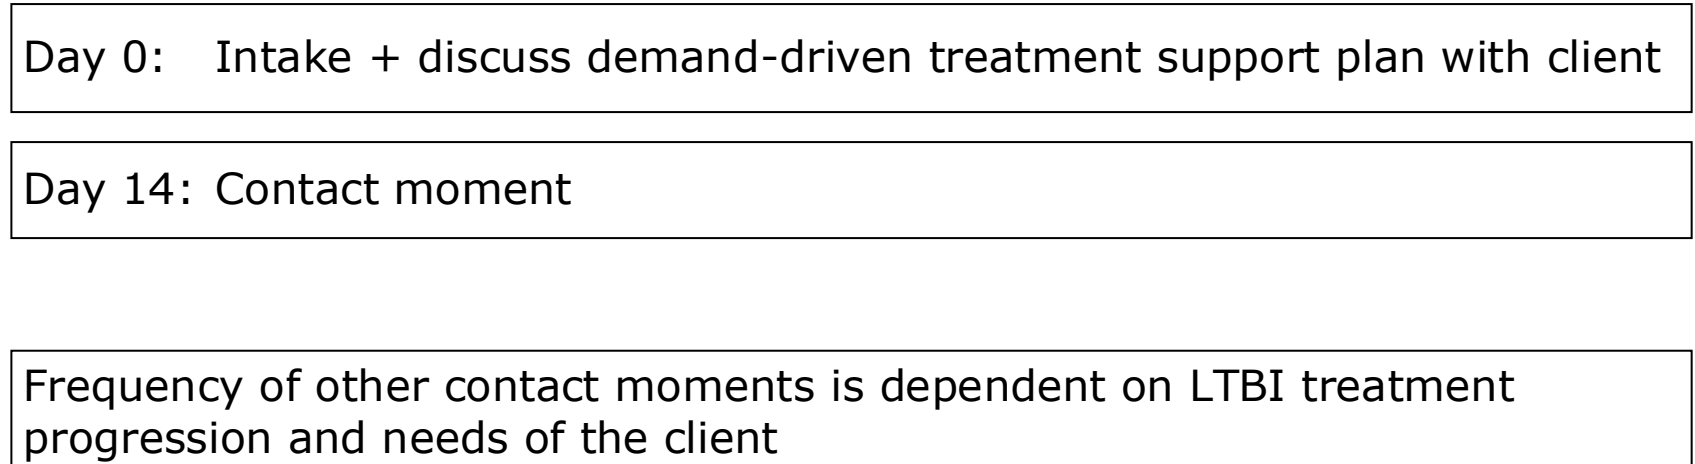

ID card identification card, IGRA Interferon Gamma Release Assay, LTBI latent tuberculosis infection, PHS Public Health Service, TB tuberculosis

\*Culture appropriate education on TB, LTBI (including cause, symptoms, transmission, diagnostics and treatment) given by trained Eritrean key figures in Tigrinya

\*\* Medical Technical Assistants (MTA), healthcare assistants trained to perform TB screening activities (symptom screening, tuberculin skin test and chest X-ray), BCG vaccination, to give information on the scope of the screening and TB in general and to document screening results and to perform specific administrative tasks.

\*\*\*Complaints: Cough, fever (>38 degrees Celsius), night sweats, poor appetite / weight loss

\*\*\*\*Immune suppressive illnesses: Inflammatory bowel disease, kidney failure / dialysis, diabetes, HIV/AIDS, cancer, organ transplantation, psoriasis, rheumatism, sarcoidosis, silicosis

\*\*\*\*\*Immune suppressive medications: Prednisone / Dexamethasone / Methotrexate, TNF-alpha blockers (biologicals), cancer medication, medication following organ transplantation
