# Supplementary material for: Strategies to reach and motivate migrant communities at high risk for TB to participate in a latent tuberculosis infection screening program: a community-engaged, mixed methods study among Eritreans
Source: PubMed Central journal article supplement (PMC7068882; doi:10.1186/s12889-020-8390-9), 2020-03-12
Supplement: 12889_2020_8390_MOESM3_ESM.pdf [file 12889_2020_8390_MOESM3_ESM.pdf]

Additional file 2. Descriptive statistics of the study population

| Characteristic                             | LTBI screening |          | LTBI diagnosis |       | Initiated LTBI treatment |        | Completed LTBI treatment |        |
|--------------------------------------------|----------------|----------|----------------|-------|--------------------------|--------|--------------------------|--------|
|                                            | n              | Column % | n              | Row % | n                        | Row %  | n                        | Row %  |
| <b>Total</b>                               | 257            | (100%)   | 30             | (12%) | 29                       | (97%)  | 28                       | (97%)  |
| <b>Public Health Service (PHS)</b>         |                |          |                |       |                          |        |                          |        |
| PHS 1                                      | 35             | (14%)    | 2              | (6%)  | 2                        | (100%) | 1                        | (50%)  |
| PHS 2                                      | 48             | (19%)    | 8              | (17%) | 7                        | (88%)  | 7                        | (100%) |
| PHS 3                                      | 62             | (24%)    | 12             | (19%) | 12                       | (100%) | 12                       | (100%) |
| PHS 4                                      | 101            | (28%)    | 8              | (8%)  | 8                        | (100%) | 8                        | (100%) |
| PHS 5                                      | 10             | (3%)     | 0              | (0%)  | -                        | -      | -                        | -      |
| <b>Gender</b>                              |                |          |                |       |                          |        |                          |        |
| Female                                     | 129            | (50%)    | 10             | (8%)  | 10                       | (100%) | 10                       | (100%) |
| Male                                       | 128            | (50%)    | 20             | (16%) | 19                       | (95%)  | 18                       | (95%)  |
| <b>Age category</b>                        |                |          |                |       |                          |        |                          |        |
| 0-17 years                                 | 48             | (19%)    | 1              | (2%)  | 1                        | (100%) | 1                        | (100%) |
| 18-24 years                                | 63             | (25%)    | 5              | (8%)  | 5                        | (100%) | 4                        | (80%)  |
| 25-34 years                                | 103            | (40%)    | 12             | (12%) | 12                       | (100%) | 12                       | (100%) |
| 35-44 years                                | 43             | (17%)    | 12             | (28%) | 11                       | (92%)  | 11                       | (100%) |
| <b>Household composition</b>               |                |          |                |       |                          |        |                          |        |
| Alone                                      | 122            | (45%)    | 16             | (13%) | 16                       | (100%) | 15                       | (94%)  |
| With family                                | 123            | (48%)    | 11             | (9%)  | 10                       | (91%)  | 10                       | (100%) |
| Missing                                    | 12             | (5%)     | 3              | (25%) | 3                        | (100%) | 3                        | (100%) |
| <b>Education level</b>                     |                |          |                |       |                          |        |                          |        |
| No formal / primary education              | 116            | (45%)    | 12             | (10%) | 11                       | (92%)  | 11                       | (100%) |
| Secondary school                           | 108            | (42%)    | 13             | (12%) | 13                       | (100%) | 12                       | (92%)  |
| Higher education                           | 28             | (11%)    | 2              | (7%)  | 2                        | (100%) | 2                        | (100%) |
| Missing                                    | 5              | (2%)     | 3              | (60%) | 3                        | (100%) | 3                        | (100%) |
| <b>Employment status</b>                   |                |          |                |       |                          |        |                          |        |
| Employed (payed job)                       | 4              | (2%)     | 0              | (0%)  | -                        | -      | -                        | -      |
| Unemployed (no payed job)                  | 35             | (14%)    | 6              | (17%) | 5                        | (83%)  | 5                        | (100%) |
| Student*                                   | 210            | (82%)    | 22             | (10%) | 22                       | (100%) | 21                       | (95%)  |
| Missing                                    | 8              | (3%)     | 2              | (25%) | 2                        | (100%) | 2                        | (100%) |
| <b>Duration of stay in the Netherlands</b> |                |          |                |       |                          |        |                          |        |
| <6 months                                  | 12             | (5%)     | 1              |       | 0                        | (0%)   |                          |        |
| ≥6 months, <1 year                         | 31             | (12%)    | 2              |       | 2                        | (100%) | 2                        | (93%)  |
| ≥1 year, <2 years                          | 25             | (10%)    | 1              |       | 1                        | (100%) | 1                        | (100%) |
| ≥2 years, <3 years                         | 89             | (35%)    | 14             |       | 14                       | (100%) | 13                       | (93%)  |
| ≥3 years, <10 years                        | 11             | (4%)     | 4              |       | 4                        | (100%) | 4                        | (100%) |
| Missing                                    | 90             | (35%)    | 8              |       | 8                        | (100%) | 8                        | (100%) |

LTBI latent tuberculosis infection, PHS public health service, TB tuberculosis

\*Includes: primary school, secondary school, college, integration courses
