# Supplementary material for: Strategies to reach and motivate migrant communities at high risk for TB to participate in a latent tuberculosis infection screening program: a community-engaged, mixed methods study among Eritreans
Source: Springer Nature journal article supplement (doi:10.1186/s12889-020-8390-9), 2020-03-12
Supplement: MOESM4 [file 17793588]

### Additional file 3. Evaluation of LTBI treatment by the TB physician

|                                                                                   | n  | (%)    |
|-----------------------------------------------------------------------------------|----|--------|
| <b>Total clients diagnosed with LTBI</b>                                          | 30 | (12%)  |
| <b>Was a language a barrier and was an interpreter used during consultations?</b> |    |        |
| No, it was no barrier and no interpreter was used                                 | 0  | -      |
| Yes, it was a little a barrier, but no interpreter was needed                     | 2  | (7%)   |
| Yes, it was a little a barrier, but no interpreter was available                  | 0  | -      |
| Yes, it was a barrier and a professional interpreter was used                     | 13 | (45%)  |
| Yes, it was a barrier and the TB nurse interpreted and supported the client       | 14 | (48%)  |
| <b>Initiation of LTBI treatment</b>                                               |    |        |
| Yes                                                                               | 29 | (97%)  |
| No, because of low IGRA value                                                     | 1  | (3%)   |
| <b>Reported side-effects during LTBI treatment</b>                                |    |        |
| Yes <sup>1</sup>                                                                  | 7  | (24%)  |
| No                                                                                | 20 | (69%)  |
| Missing                                                                           | 2  | (7%)   |
| <b>Challenges reported by PHS staff during LTBI treatment</b>                     |    |        |
| Yes                                                                               | 8  | (28%)  |
| No                                                                                | 18 | (62%)  |
| Missing                                                                           | 3  | (10%)  |
| <b>Type of challenge reported during LTBI treatment</b>                           |    |        |
| Compliance / Adherence                                                            | 1  | (3%)   |
| Difficulties follow-up appointments                                               | 1  | (3%)   |
| Difficulties duration of PT / amount of pills                                     | 1  | (3%)   |
| Afraid of blood sampling                                                          | 1  | (3%)   |
| Difficult to not drink alcohol                                                    | 1  | (3%)   |
| Difficult to reach by phone                                                       | 1  | (3%)   |
| Difficulties understanding LTBI                                                   | 1  | (3%)   |
| <b>LTBI treatment support given by TB nurse</b>                                   |    |        |
| Yes                                                                               | 29 | (100%) |
| < 10 times                                                                        | 27 | (93%)  |
| ≥ 10 times                                                                        | 1  | (3%)   |
| Missing                                                                           | 1  | (3%)   |
| <b>Client received Directly Observed Therapy</b>                                  |    |        |
| No                                                                                | 29 | (100%) |
| <b>LTBI treatment result</b>                                                      |    |        |
| Completed <sup>2</sup>                                                            | 28 | (97%)  |

LTBI Latent tuberculosis infection, PHS Public Health Service, TB Tuberculosis

<sup>1</sup> Side effects reported: hepatotoxicity (n=3)

<sup>2</sup> LTBI treatment discontinued (n=1) due to side-effects (psychosis)
